# Supplementary material
Source: publisher figshare collection journal article supplement (https://sage.figshare.com/ndownloader/files/12728222)
Supplement: Supplementary file 1 [file 12728222]

Table S2. Non-communicable disease risk factors in women aged 40-45 years, by educational level 1974-2002.

|  | Education | | | Absolute inequality |
| --- | --- | --- | --- | --- |
|  | Lower | Secondary | Tertiary | Slope Index of Inequality, SII |
| Total cholesterol, mmol/l | N=7518 | N=7301 | N=1909 |  |
| 1974-78 | 6.48 (1.28) | 6.25 (1.15) | 6.12 (1.09) | 0.49 (0.37, 0.60) |
| 1985-88 | 6.12 (1.12) | 5.87 (1.05) | 5.61 (0.98) | 0.63 (0.55, 0.72) |
| 2001-02 | 5.59 (1.00) | 5.44 (0.96) | 5.23 (0.86) | 0.44 (0.23, 0.65) |
| *p-trend* | *<0.001* | *<0.001* | *<0.001* | *0.340* |
| Systolic blood pressure, mmHg |  |  |  |  |
| 1974-78 | 135.8 (19.1) | 132.7 (17.1) | 125.1 (14.3) | 8.0 (6.3, 9.7) |
| 1985-88 | 130.5 (15.7) | 127.5 (14.7) | 125.1 (14.3) | 7.0 (5.8, 8.2) |
| 2001-02 | 122.1 (16.3) | 120.6 (16.0) | 116.2 (14.8) | 7.7 (4.3, 11.1) |
| *p-trend* | *<0.001* | *<0.001* | *<0.001* | *0.441* |
| Diastolic blood pressure, mmHg |  |  |  |  |
| 1974-78 | 85.5 (11.1) | 81.6 (10.5) | 79.8 (10.1) | 2.4 (1.4, 3.4) |
| 1985-88 | 78.9 (10.4) | 77.2 (10.1) | 75.4 (10.2) | 4.3 (3.5, 5.1) |
| 2001-02 | 72.5 (9.6) | 71.4 (9.2) | 70.2 (8.9) | 2.8 (0.8, 4.8) |
| *p-trend* | *<0.001* | *<0.001* | *<0.001* | *0.061* |
| Daily smoking, % |  |  |  |  |
| 1974-78 | 44.5 | 34.2 | 24.1 | 25 (20, 29) |
| 1985-88 | 52.0 | 40.0 | 19.6 | 42 (38, 46) |
| 2001-02 | 65.8 | 41.6 | 19.0 | 54 (44, 64) |
| *p-trend* | *<0.001* | *<0.001* | *0.079* | *<0.001* |
| Physical inactive, % |  |  |  |  |
| 1974-78 | 24.0 | 20.8 | 17.6 | 7 (4, 11) |
| 1985-88 | 25.1 | 21.5 | 18.9 | 8 (6, 11) |
| 2001-02 | 27.5 | 21.8 | 17.5 | 11 (2, 20) |
| *p-trend* | *0.175* | *0.481* | *0.962* | *0.527* |
| BMI, kg/m2 |  |  |  |  |
| 1974-78 | 25.5 (4.4) | 24.8 (3.9) | 23.9 (3.4) | 1.60 (1.20, 2.00) |
| 1985-88 | 25.1 (4.3) | 24.3 (3.8) | 23.6 (3.4) | 1.96 (1.64, 2.28) |
| 2001-02 | 26.2 (4.7) | 26.2 (4.6) | 25.3 (4.6) | 1.38 (0.37, 2.39) |
| *p-trend* | *0.015* | *<0.001* | *<0.001* | *0.623* |
| Triglycerides, mmol/l |  |  |  |  |
| 1974-78 | 1.52 (0.91) | 1.37 (0.75) | 1.22 (0.71) | 0.35 (0.27, 0.43) |
| 1985-88 | 1.54 (0.93) | 1.37 (0.78) | 1.19 (0.61) | 0.45 (0.38, 0.52) |
| 2001-02 | 1.68 (1.83) | 1.41 (0.85) | 1.18 (0.72) | 0.58 (0.36, 0.80) |
| *p-trend* | *0.067* | *0.420* | *0.424* | *0.008* |
